# Supplementary material
Source: HighWire-hosted journal article supplement (http://www.cmaj.ca/highwire/filestream/58086/field_highwire_adjunct_files/0/depress-stewart-f.pdf)
Supplement: depress-stewart-f.pdf [file depress-stewart-f.pdf]

## Recherche

## Combattre la dépression

Donna E. Stewart MD

La dépression est un problème de santé publique majeur dont on prédit qu'elle sera d'ici 2020 à l'échelle mondiale la deuxième cause d'invalidité attribuable à une maladie après la maladie cardiovasculaire. Chez les femmes, elle est déjà la plus importante cause d'invalidité attribuable à une maladie et dans la plupart des pays, la prévalence de la dépression chez les femmes entre la puberté et la ménopause est 2 fois plus élevée que chez les hommes du même âge<sup>1</sup>. Au Canada, la prévalence de la dépression sur une période de 12 mois chez les personnes âgées de 18 à 65 ans est de 4,8 % (5,9 % chez les femmes et 3,7 % chez les hommes), la disparité selon le sexe étant encore plus marquée au cours des années de fertilité<sup>2</sup>. Certains sous-groupes de Canadiens sont exposés à un risque encore plus grand; par exemple, les membres des communautés autochtones vivant à l'extérieur des réserves sont 1,5 fois plus susceptibles que les autres Canadiens de se sentir déprimés au cours d'une période de 12 mois. Les taux de dépression sont légèrement plus élevés aux États-Unis et légèrement moins élevés en Europe, mais suivent la même répartition selon le sexe. En plus de causer une souffrance indéniable à la personne atteinte, la dépression exerce des effets négatifs sur son état de santé général, sur le bien-être de sa famille, sur sa productivité au travail et sur les coûts des soins de santé. Elle peut également conduire à des comportements autodestructeurs, voire au suicide<sup>2</sup>.

Malheureusement, la dépression est très peu reconnue et insuffisamment traitée, tant en médecine générale qu'en médecine spécialisée. De nombreuses études réalisées dans des pays industrialisés signalent en effet que la dépression n'est reconnue, et a fortiori adéquatement traitée, que chez la moitié seulement des patients atteints de dépression qui sont suivis par des omnipraticiens ou dans des hôpitaux généraux<sup>3</sup>. Au Canada et ailleurs, la plupart des patients atteints de dépression sont traités exclusivement par des médecins généralistes. Diverses raisons ont été invoquées pour expliquer le faible taux de reconnaissance de la maladie, notamment, le manque de temps, la présence de maladies concomitantes, les préjugés, le penchant des médecins pour les maladies physiques, l'incertitude quant à l'efficacité des traitements et le déni des patients. On a proposé le dépistage comme méthode de reconnaissance de la dépression en médecine générale et dans les cliniques périnatales, cardiovasculaires et du diabète. Mais le dépistage utilisé seul peut-il avoir des effets favorables sur la reconnaissance, le traitement et l'issue de la dépression?

Dans ce numéro du *JAMC*, Gilbody et ses collaborateurs se sont penchés sur cette question dans le cadre du Groupe Cochrane par le biais d'une synthèse systématique et d'une méta-analyse rigoureuses de 16 essais contrôlés randomisés réalisés en contexte de soins de santé non psychiatriques.<sup>4</sup> Les auteurs ont constaté que le dépistage et les outils diagnostiques étaient associés à une augmentation modeste de la reconnaissance de la dé-

## Points clés

- Le dépistage seul n'améliore pas la reconnaissance, le traitement ou l'issue de la dépression en contexte de soins primaires et dans les hôpitaux généraux.
- Parmi les traitements préconisés par la médecine factuelle pour la dépression, mentionnons les antidépresseurs et la psychothérapie cognitivocomportementale. Les patients peuvent répondre différemment aux antidépresseurs ou à la psychothérapie.
- Il faut mettre en œuvre des programmes systématiques, concertés, multidisciplinaires et coordonnés pour améliorer le pronostic de la dépression.

pression par les médecins (risque relatif [RR] 1,27, intervalle de confiance [IC] à 95 % 1,02 à 1,59). Lorsqu'on a administré des questionnaires à tous les patients et transmis les résultats aux médecins, indépendamment du score de départ des patients, cela n'a eu aucun impact sur la reconnaissance de la dépression (RR 1,03, IC à 95 % 0,85 à 1,24). Par contre, les auteurs ont signalé un effet significatif limite sur la prise en charge globale de la dépression (RR 1,30, IC à 95 % 0,97 à 1,76) et n'ont noté aucune influence manifeste sur la prescription d'antidépresseurs (RR 1,20, IC à 95 % 0,87 à 1,66). Sept études ont mesuré l'impact du dépistage sur l'issue de la dépression, mais rien n'en est ressorti (différence moyenne standardisée -0,02, IC à 95 % -0,25 à 0,20). Les auteurs ont conclu qu'il n'était pas justifié de recommander l'adoption de stratégies de dépistage de la dépression isolément et que la clé du succès repose probablement sur une amélioration d'ordre organisationnel.

Donc, étant donné que la dépression est un problème de santé grave, que faire pour améliorer sa reconnaissance, son traitement et son issue? Bien que les résultats de Gilbody et ses collègues en aient surpris certains, ils concordent pourtant avec les rapports du Groupe d'étude canadien sur les soins de santé préventifs et de son pendant américain, selon lesquels le dépistage de la dépression doit s'accompagner d'un diagnostic précis, d'un traitement efficace et d'un suivi<sup>5</sup>, d'où la nécessité de modifier le système dans son ensemble pour améliorer l'issue de la dépression. Cela suppose pour commencer que nous devons vérifier ce qui a fonctionné en recherche et dans d'autres contextes.

Une revue systématique de l'efficacité des stratégies axées sur la sensibilisation et l'organisation pour améliorer la prise en charge de la dépression en médecine générale a révélé que l'efficacité était habituellement associée à des interventions

Donna E. Stewart est professeure d'université et directrice du programme de santé des femmes du Réseau universitaire de santé de l'Université de Toronto, Toronto, Ont.

complexes, incorporant un enseignement aux médecins, la gestion des cas par le personnel infirmier et une plus grande harmonie entre les soins médicaux généraux et spécialisés<sup>6</sup>. On a constaté l'efficacité du counselling téléphonique pharmacothérapeutique effectué par des infirmières praticiennes et des spécialistes en santé mentale. En revanche, la simple mise en œuvre de directives ou de stratégies de sensibilisation a semblé généralement inefficace<sup>6</sup>.

Lors d'une récente étude contrôlée randomisée, en médecine générale, au Royaume-Uni, on a vérifié ces résultats en assignant les patients soit aux soins usuels, soit à des soins intégrés incluant : gestion de cas, coordination du soutien pharmacothérapeutique, psychothérapie brève et amélioration des canaux de communication entre médecine générale et médecine spécialisée<sup>7</sup>. Les chercheurs ont conclu que «les soins en collaboration constituent une intervention organisationnelle dotée d'un fort potentiel pour ce qui est d'améliorer le traitement de la dépression en médecine générale au Royaume-Uni; son effet est fort probablement tributaire des aspects organisationnels de l'intervention»<sup>7</sup>.

Une étude précédente réalisée aux États-Unis a montré que les modèles de soins en collaboration en médecine générale, avec la participation de psychologues (qui fournissent une psychothérapie brève pour améliorer les mécanismes d'adaptation) et de psychiatres (à titre d'experts en pharmacothérapie), ont amélioré l'observance thérapeutique, la satisfaction à l'endroit des soins et l'issue clinique chez les patients atteints de dépression majeure, mais non de dépression mineure<sup>8</sup>.

Un petit essai contrôlé randomisé réalisé aux États-Unis, qui visait à comparer les soins usuels et les soins gérés par le biais de consultations téléphoniques, a révélé que le groupe soumis au suivi téléphonique avait connu une amélioration significativement plus grande que le groupe soumis aux soins usuels<sup>9</sup>. Cette étude a aussi établi un lien entre l'amélioration de la dépression chez les sujets soumis au suivi téléphonique et une meilleure conformité des médecins aux arbres décisionnels thérapeutiques, mais non entre l'amélioration de la dépression et la fidélité des patients aux recommandations de leurs médecins<sup>9</sup>.

L'étude la plus réussie à ce jour a probablement été la grande étude intensive sur les améliorations de la qualité des soins pour la dépression appelée «Partners in Care». Cette étude comparait les cliniques de soins primaires à la prestation de soins usuels (envoi de directives de pratique par la poste) ou à un programme d'amélioration de la qualité. Le programme d'amélioration de la qualité comprenait les éléments suivants : engagement de la part des établissements, formation d'experts locaux en éducation des médecins et des patients et suivi des patients au sujet de leur pharmacothérapie par le personnel infirmier ou accès à des psychothérapeutes dûment formés en thérapie cognitivocomportementale individuelle et de groupe, selon les spécifications d'un manuel. Ce programme a aussi procédé à un dépistage auprès de tous les patients suivis en contexte de soins primaires, incluant de la documentation et des causeries à l'intention des médecins et des patients, et offrait un suivi continu aux médecins selon les résultats de l'examen des dossiers. À 6 et à 12 mois, un plus grand nombre de patients inscrits au programme d'amélioration de la qualité (par rapport au programme de soins usuels) avaient reçu un counselling, utilisé des antidépresseurs à une dose appropriée, consulté pour un problème de santé mentale et vu un spécialiste en santé mentale. Le nombre de visites médicales globales n'a toutefois pas augmenté. À noter surtout, compara-

tivement aux patients du groupe soumis aux soins usuels, les patients du groupe soumis au programme d'amélioration de la qualité ont obtenu de meilleurs résultats sur le plan de l'amélioration de la dépression après 6 et 12 mois de suivi et à 12 mois, ils étaient plus susceptibles d'être au travail<sup>10</sup>.

Nous pouvons conclure avec certitude que le dépistage seul de la dépression en contexte de soins primaires et en milieu hospitalier n'a pas amélioré le pronostic. Il faut appliquer des stratégies complexes alliant des interventions systématiques qui peuvent inclure un dépistage de la dépression parmi d'autres éléments. Nous devons faire intervenir le personnel infirmier en santé mentale, les psychologues, les travailleurs sociaux, les gestionnaires de cas, de même que les médecins de famille et les psychiatres dans un effort concerté pour améliorer le traitement de la dépression. Les antidépresseurs sont efficaces chez environ la moitié de tous les patients dépressifs et la thérapie cognitivocomportementale est aussi un outil thérapeutique utile dans la dépression de légère à modérée et dans la prévention de ses récurrences. Les patients qui souffrent de dépression peuvent répondre différemment aux médicaments ou à la psychothérapie. C'est pourquoi nous devons adapter nos approches. Étant donné que la dépression est un trouble récurrent chronique, nous avons aussi besoin de stratégies à plus long terme pour bien la prendre en charge et prévenir les récurrences. De toute évidence, il n'y a pas de remède miracle, mais plus tôt nous aurons mis au point des interventions coordonnées, systématiques, concertées, multidisciplinaires et factuelles pour remplacer notre modèle actuel, qui repose sur la prescription de comprimés par un seul professionnel de la santé, plus tôt nous observerons une amélioration des pronostics, de la qualité de vie et de la productivité des patients atteints de cette maladie fort répandue.

**Conflit d'intérêts :** Donna E. Stewart siège aux conseils consultatifs de Eli Lilly et de Wyeth.

## RÉFÉRENCES

1. Murray CJ, Lopez AD, éd. *The global burden of disease: A comprehensive assessment of morbidity and disability from disease, injuries and risk factors in 1990 and projected to 2020*. Cambridge (MA) : Harvard University Press; 1996.
2. Stewart DE, Gucciardi E, Grace SL. Depression. *BioMed Central Women's Health* 2004;25: Suppl 1-19.
3. Katon W, Ciechanowski P. Impact of major depression on chronic medical illness. *J Psychosom Res* 2002;53:859-63.
4. Gilbody S, Sheldon T, House A. Screening and case-finding for depression : a Cochrane systematic review. *CMAJ* 2008;178:997-1003.
5. MacMillan HL, Patterson CJS, Wathen CN; Canadian Task Force on Preventive Health Care. Screening for depression in primary care: recommendation statement from the Canadian Task Force on Preventive Health Care. *CMAJ* 2005;172:33-5.
6. Gilbody S, Whitty P, Grimshaw J et coll. Educational and organizational interventions to improve the management of depression in primary care: a systemic review. *JAMA* 2003;289:3145-51.
7. Richards DA, Lovell K, Gilbody S et coll., Collaborative care for depression in UK primary care: a randomized controlled trial. *Psychol Med* 2008;38:279-87.
8. Katon W, Robinson P, VonKorff M et coll., A multifaceted intervention to improve treatment of depression in primary care. *Arch Gen Psychiatry* 1996;53:924-32.
9. Datto CJ, Thompson R, Horowitz D et coll., The pilot study of telephone disease management program for depression. *Gen Hosp Psychiatry* 2003;25:169-77.
10. Wells KB, Sherbourne C, Schoenbaum M et coll., Impact of disseminating quality improvement programs for depression in managed primary care: a randomized controlled trial. *JAMA* 2000;283:212-20.

**Correspondance :** D<sup>e</sup> Donna E. Stewart, University Health Network, Women's Health Program, University of Toronto, 200 Elizabeth St., EN-7-229 Toronto ON M5G 2C4; donna.stewart@uhn.on.ca
